# Supplementary material for: High expression of DNA damage-inducible transcript 4 (DDIT4) is associated with advanced pathological features in the patients with colorectal cancer
Source: PubMed Central journal article supplement (PMC8249407; doi:10.1038/s41598-021-92720-z), 2021-07-01
Supplement: 41598_2021_92720_MOESM1_ESM.pdf [file 41598_2021_92720_MOESM1_ESM.pdf]

**High Expression of DNA Damage-Inducible Transcript 4 (DDIT4) Is  
Associated with Advanced Pathological Features in the Patients with Colorectal  
Cancer**

**Fahimeh Fattahi, Leili Saeednejad Zanjani, Zohreh Habibi Shams, Jafar Kiani, Mitra  
Mehrazma, Mohammad Najafi, Zahra Madjd**

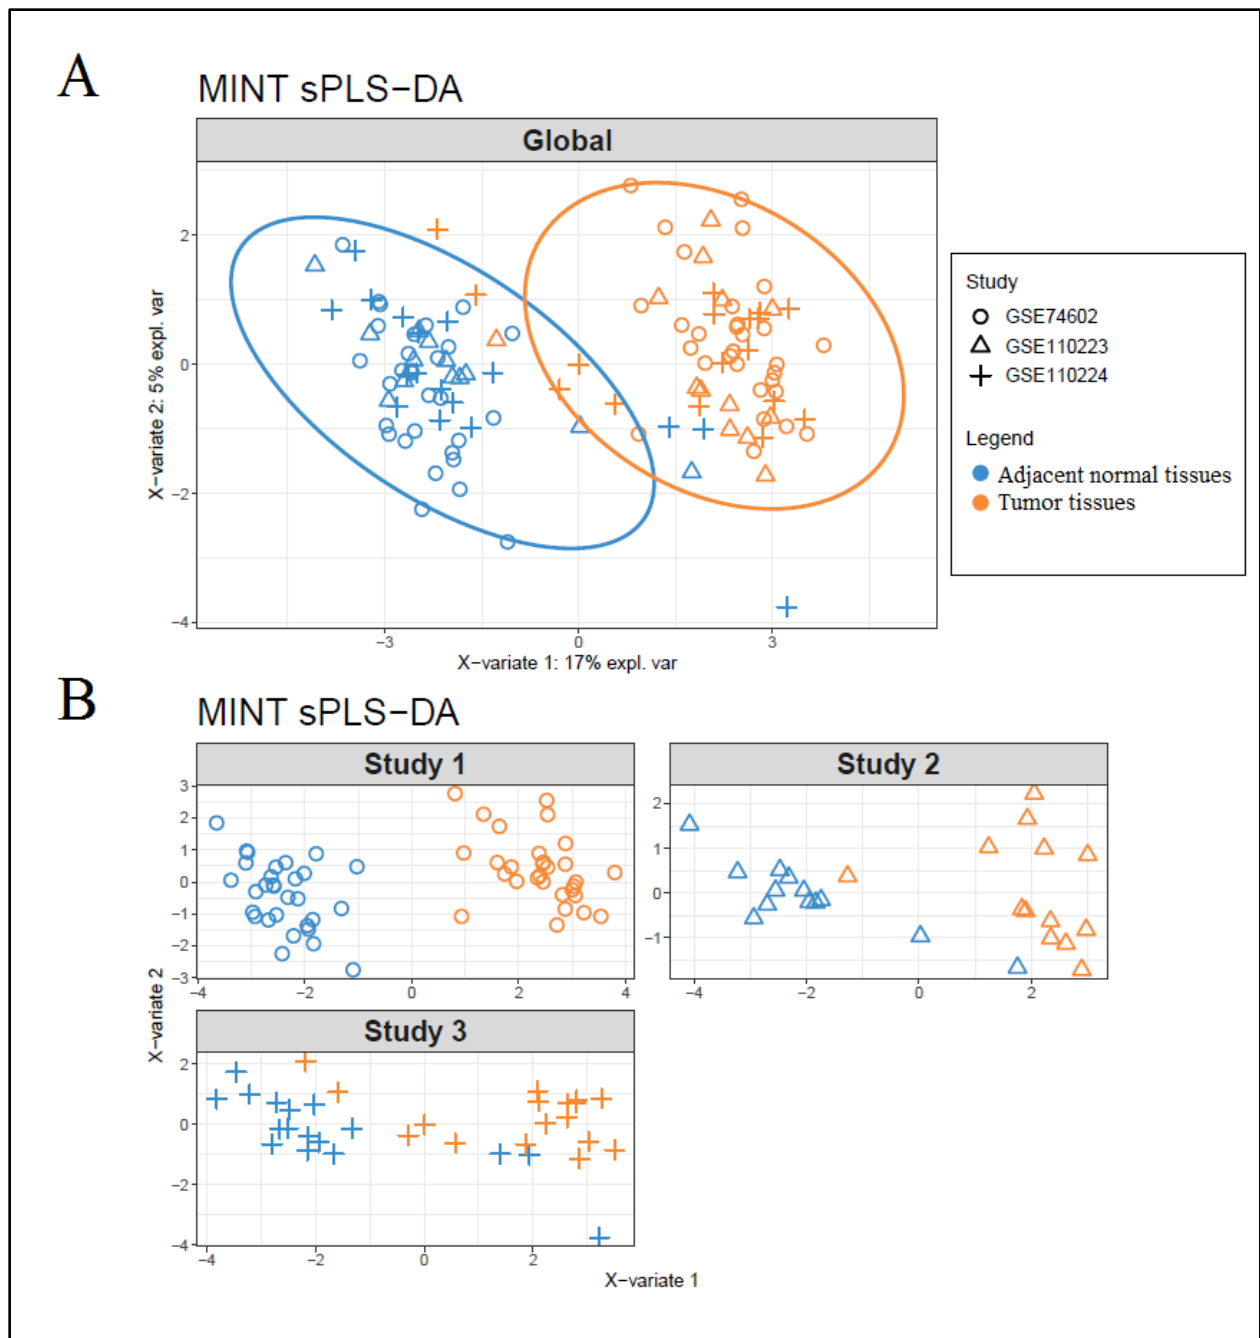

**Supplementary Fig.S1. MINT sPLS-DA plots for differentially expressed genes (DEGs) in CRC by MINT method.** MINT sPLS-DA plots for **A**) DEGs in tumor tissues of merged three study (GSE74602, GSE110223, and GSE110224) from GEO and **B**) DEGs in tumor tissues of GSE74602, GSE110223, and GSE110224 separately were shown by MINT method in R platform.

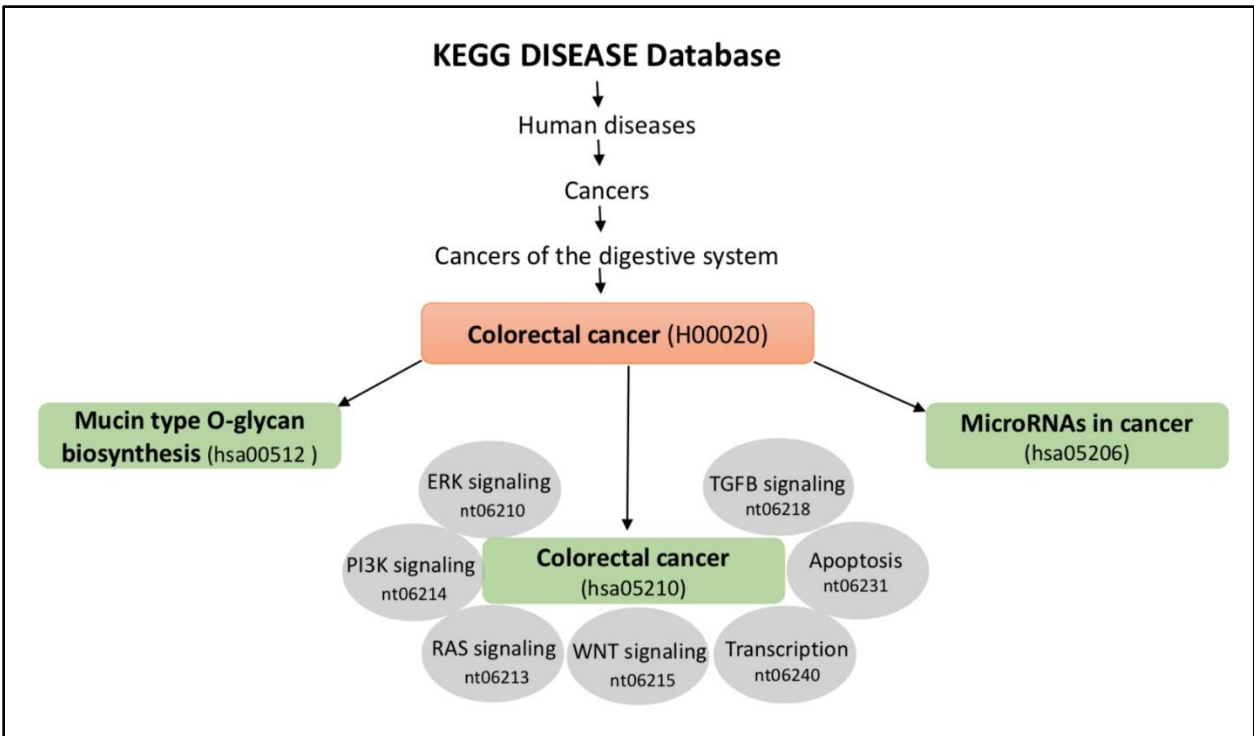

**Supplementary Fig.S2. Pathways related to colorectal cancer (CRC) recorded on the KEGG DISEASE Database.** In this flowchart, the access path to CRC pathways on the KEGG DISEASE Database is summarized.
